# Supplementary material for: Bimekizumab Efficacy in High-Impact Areas: Pooled 2-Year Analysis in Scalp, Nail, and Palmoplantar Psoriasis from Phase 3/3b Randomized Controlled Trials
Source: PubMed Central journal article supplement — Dermatol Ther (Heidelb). 2024 Nov 22;14(12):3291–306. doi: 10.1007/s13555-024-01295-w (PMC11604908; doi:10.1007/s13555-024-01295-w), 2024-11-22
Supplement: 13555_2024_1295_MOESM1_ESM.pdf [file 13555_2024_1295_MOESM1_ESM.pdf]

# **Bimekizumab Efficacy in High-Impact Areas: Pooled 2-Year Analysis in Scalp, Nail, and Palmoplantar Psoriasis from Phase 3/3b Randomized Controlled Trials**

Joseph F. Merola,<sup>1</sup> Alice B. Gottlieb,<sup>2</sup> Andreas Pinter,<sup>3</sup> Boni Elewski,<sup>4</sup>

Melinda Gooderham,<sup>5,6</sup> Richard B. Warren,<sup>7,8</sup> Stefano Piaserico,<sup>9</sup> Krista Wixted,<sup>10</sup>

Nancy Cross,<sup>10</sup> Nicola Tilt,<sup>11</sup> Susanne Wiegatz,<sup>12</sup> Ulrich Mrowietz<sup>13</sup>

<sup>1</sup>Department of Dermatology and Department of Medicine, Division of Rheumatology, UT Southwestern Medical Center, Dallas, TX, USA; <sup>2</sup>Department of Dermatology, The Icahn School of Medicine at Mount Sinai, New York, NY, USA; <sup>3</sup>University Hospital Frankfurt, Frankfurt am Main, Germany; <sup>4</sup>Department of Dermatology, University Hospitals of Cleveland, Case Western Reserve University, Cleveland, OH, USA; <sup>5</sup>SKiN Centre for Dermatology, Probity Medical Research, Peterborough, ON, Canada; <sup>6</sup>Department of Medicine, Queen's University, Kingston, ON, Canada; <sup>7</sup>Dermatology Centre, Northern Care Alliance NHS Foundation Trust, Manchester, UK; <sup>8</sup>NIHR Manchester Biomedical Research Centre, Manchester University NHS Foundation Trust, Manchester Academic Health Science Centre, Manchester, UK; <sup>9</sup>Dermatology Unit, Department of Medicine, Università di Padova, Padova, Italy; <sup>10</sup>UCB Pharma, Morrisville, NC, USA; <sup>11</sup>UCB Pharma, Slough, UK; <sup>12</sup>UCB Pharma, Monheim am Rhein, Germany; <sup>13</sup>Psoriasis-Center, Department of Dermatology, University Medical Center Schleswig-Holstein, Campus Kiel, Germany

## **Corresponding author:**

Joseph F. Merola, MD M.MSc

Department of Dermatology

UT Southwestern Medical Center

5323 Harry Hines Blvd, Dallas, TX 75390, USA

+1 214-648-3111

Email: [Joseph.Merola@UTSouthwestern.edu](mailto:Joseph.Merola@UTSouthwestern.edu)

**Fig S1. Bimekizumab nail treatment example over 48 weeks from BE RADIANT**

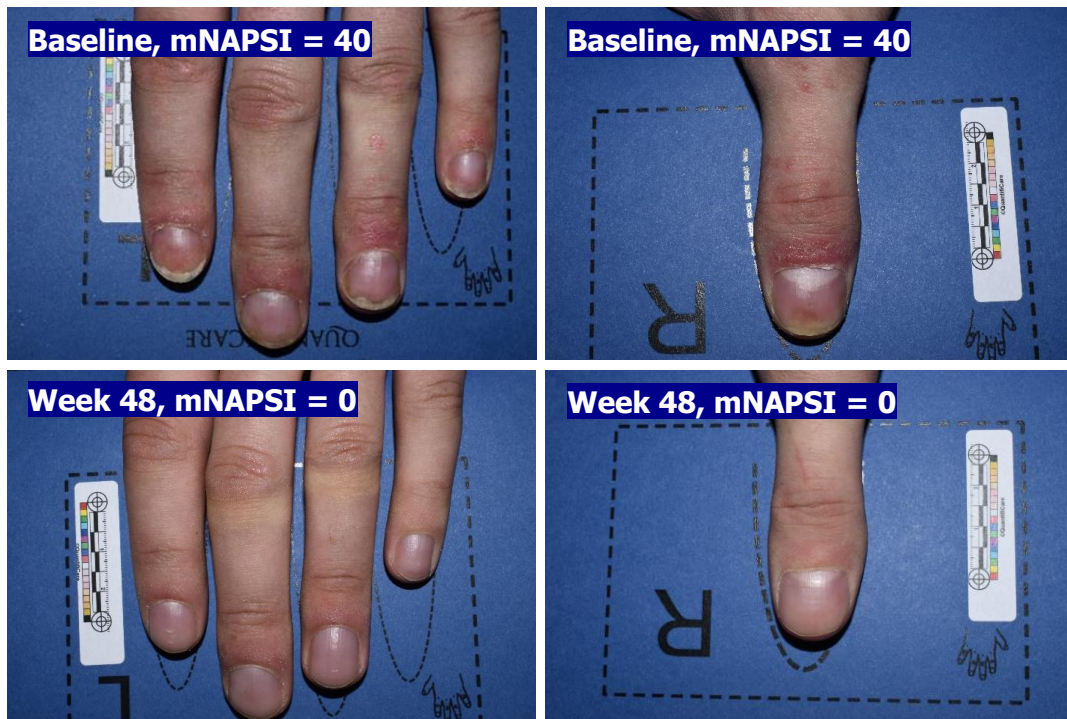

Previously presented at EADV 2021. Photos show the left-hand fingers and right thumb from one patient treated with bimekizumab (BKZ) every 4 weeks (Q4W)/every 8 weeks (Q8W) in BE RADIANT and included in this analysis, with the total modified Nail Psoriasis Severity Index (mNAPSI) shown at baseline and Week 48. BKZ: bimekizumab; mNAPSI: modified Nail Psoriasis Severity Index; Q4W: every 4 weeks; Q8W: every 8 weeks.

**Table S1. Mean percent change from baseline in scalp, nail, or palmoplantar psoriasis over 2 years (OC)**

| OC; mean % change (SE)               | Scalp IGA $\geq 3$<br>(N=821) |                           | mNAPSI $> 10$<br>(N=377) |                           | Palmoplantar IGA $\geq 3$<br>(N=193) |                          |
|--------------------------------------|-------------------------------|---------------------------|--------------------------|---------------------------|--------------------------------------|--------------------------|
|                                      | BKZ total<br>(N=821)          | BKZ<br>Q4W/Q8W<br>(n=277) | BKZ total<br>(N=377)     | BKZ<br>Q4W/Q8W<br>(n=129) | BKZ total<br>(N=193)                 | BKZ<br>Q4W/Q8W<br>(n=52) |
| Week 16                              | -92.2 (0.7)                   | -93.5 (1.1)               | -64.5 (2.0)              | -71.1 (2.7)               | -92.6 (1.5)                          | -97.0 (1.3)              |
| Year 1<br>(OLE Week 0 <sup>a</sup> ) | -94.1 (0.7)                   | -96.3 (0.8)               | -91.3 (1.1)              | -93.2 (1.4)               | -95.3 (1.2)                          | -97.6 (1.5)              |
| OLE Week 24                          | -93.4 (0.7)                   | -95.3 (1.0)               | -93.4 (0.9)              | -94.8 (1.1)               | -96.7 (1.1)                          | -95.3 (2.4)              |
| Year 2<br>(OLE Week 48)              | -93.4 (0.7)                   | -94.6 (1.2)               | -91.5 (1.3)              | -92.5 (1.7)               | -96.2 (1.1)                          | -97.2 (1.4)              |

Scalp Investigator's Global Assessment (IGA) data are for patients with baseline scalp IGA  $\geq 3$ , modified Nail Psoriasis Severity Index (mNAPSI) for patients with baseline mNAPSI  $> 10$ , and palmoplantar IGA for patients with baseline palmoplantar IGA  $\geq 3$ . Data are presented for patients with plaque psoriasis initially randomized to bimekizumab (BKZ) who later entered the open-label extension (OLE). Observed case (OC) was used for missing data. BKZ total consists of patients randomized to receive BKZ 320 mg every 4 weeks (Q4W) to Week 16, and who received either BKZ Q4W or every 8 weeks (Q8W) to the end of the first year (Week 48/52/56), and entered the OLE. BKZ Q4W/Q8W consists of patients randomized to BKZ 320 mg Q4W to Week 16, who received BKZ Q8W throughout the maintenance period and on OLE entry; there are no BE VIVID patients in this treatment arm. [a] OLE Week 0 corresponds to Week 48 for BE SURE, BE READY, and BE RADIANT, and Week 52 for BE VIVID. BKZ: bimekizumab; IGA: Investigator's Global Assessment; mNAPSI: modified Nail Psoriasis Severity Index; OC: observed case; OLE: open-label extension; Q4W: every 4 weeks; Q8W: every 8 weeks; SE: standard error.

**Table S2. Complete clearance in scalp, nail, or palmoplantar psoriasis over 2 years (NRI)**

| Achievement of scalp IGA 0, mNAPSI 0, or palmoplantar IGA 0, n (%) | Scalp IGA ≥3 (N=821) |                     | mNAPSI >10 (N=377) |                     | Palmoplantar IGA ≥3 (N=193) |                    |
|--------------------------------------------------------------------|----------------------|---------------------|--------------------|---------------------|-----------------------------|--------------------|
|                                                                    | BKZ total (N=821)    | BKZ Q4W/Q8W (n=277) | BKZ total (N=377)  | BKZ Q4W/Q8W (n=129) | BKZ total (N=193)           | BKZ Q4W/Q8W (n=52) |
| Week 16                                                            | 681 (82.9)           | 239 (86.3)          | 85 (22.5)          | 39 (30.2)           | 167 (86.5)                  | 47 (90.4)          |
| Year 1 (OLE Week 0 <sup>a</sup> )                                  | 696 (84.8)           | 245 (88.4)          | 237 (62.9)         | 89 (69.0)           | 167 (86.5)                  | 49 (94.2)          |
| OLE Week 24                                                        | 630 (76.7)           | 220 (79.4)          | 243 (64.5)         | 89 (69.0)           | 140 (72.5)                  | 35 (67.3)          |
| Year 2 (OLE Week 48)                                               | 643 (78.3)           | 230 (83.0)          | 246 (65.3)         | 87 (67.4)           | 151 (78.2)                  | 43 (82.7)          |

Scalp Investigator's Global Assessment (IGA) 0 data are presented for patients with baseline scalp IGA ≥3, modified Nail Psoriasis Severity Index (mNAPSI) 0 for patients with baseline mNAPSI >10, and palmoplantar IGA 0 for patients with baseline palmoplantar IGA ≥3. Data are presented for patients with plaque psoriasis initially randomized to BKZ who later entered the open-label extension (OLE). Non-responder imputation (NRI) was used for missing data. BKZ total consists of patients randomized to receive BKZ 320 mg every 4 weeks (Q4W) to Week 16, and who received either BKZ Q4W or every 8 weeks (Q8W) to the end of the first year (Week 48/52/56), and entered the OLE. BKZ Q4W/Q8W consists of patients randomized to BKZ 320 mg Q4W to Week 16, who received BKZ Q8W throughout the maintenance period and on OLE entry; there are no BE VIVID patients in this treatment arm. [a] OLE Week 0 corresponds to Week 48 for BE SURE, BE READY, and BE RADIANT, and Week 52 for BE VIVID. BKZ: bimekizumab; IGA: Investigator's Global Assessment; mNAPSI: modified Nail Psoriasis Severity Index; NRI: non-responder imputation; OC: observed case; OLE: open-label extension; Q4W: every 4 weeks; Q8W: every 8 weeks.
